# Supplementary material
Source: publisher figshare collection journal article supplement (https://acs.figshare.com/ndownloader/files/12700811)
Supplement: Supplementary file 1 [file 12700811]

## **Supplementary Information:**

### **Structural Behaviour of Isolated Asphaltene Molecules at the Oil-Water Interface**

Meena B. Singh<sup>1</sup>, Nakul Rampal<sup>1,2</sup>, Ateeque Malani<sup>\*,1</sup>

<sup>1</sup>Department of Chemical Engineering, Indian Institute of Technology Bombay, Mumbai,  
400076 India.

<sup>2</sup>Department of Chemical and Biomolecular Engineering, University of California, Berkeley  
94720, United States

\*To whom correspondence should be addressed:

E-mail: [amalani@iitb.ac.in](mailto:amalani@iitb.ac.in)

Ph : +91-22-2576 7205

Fax : +91-22-2576 6895

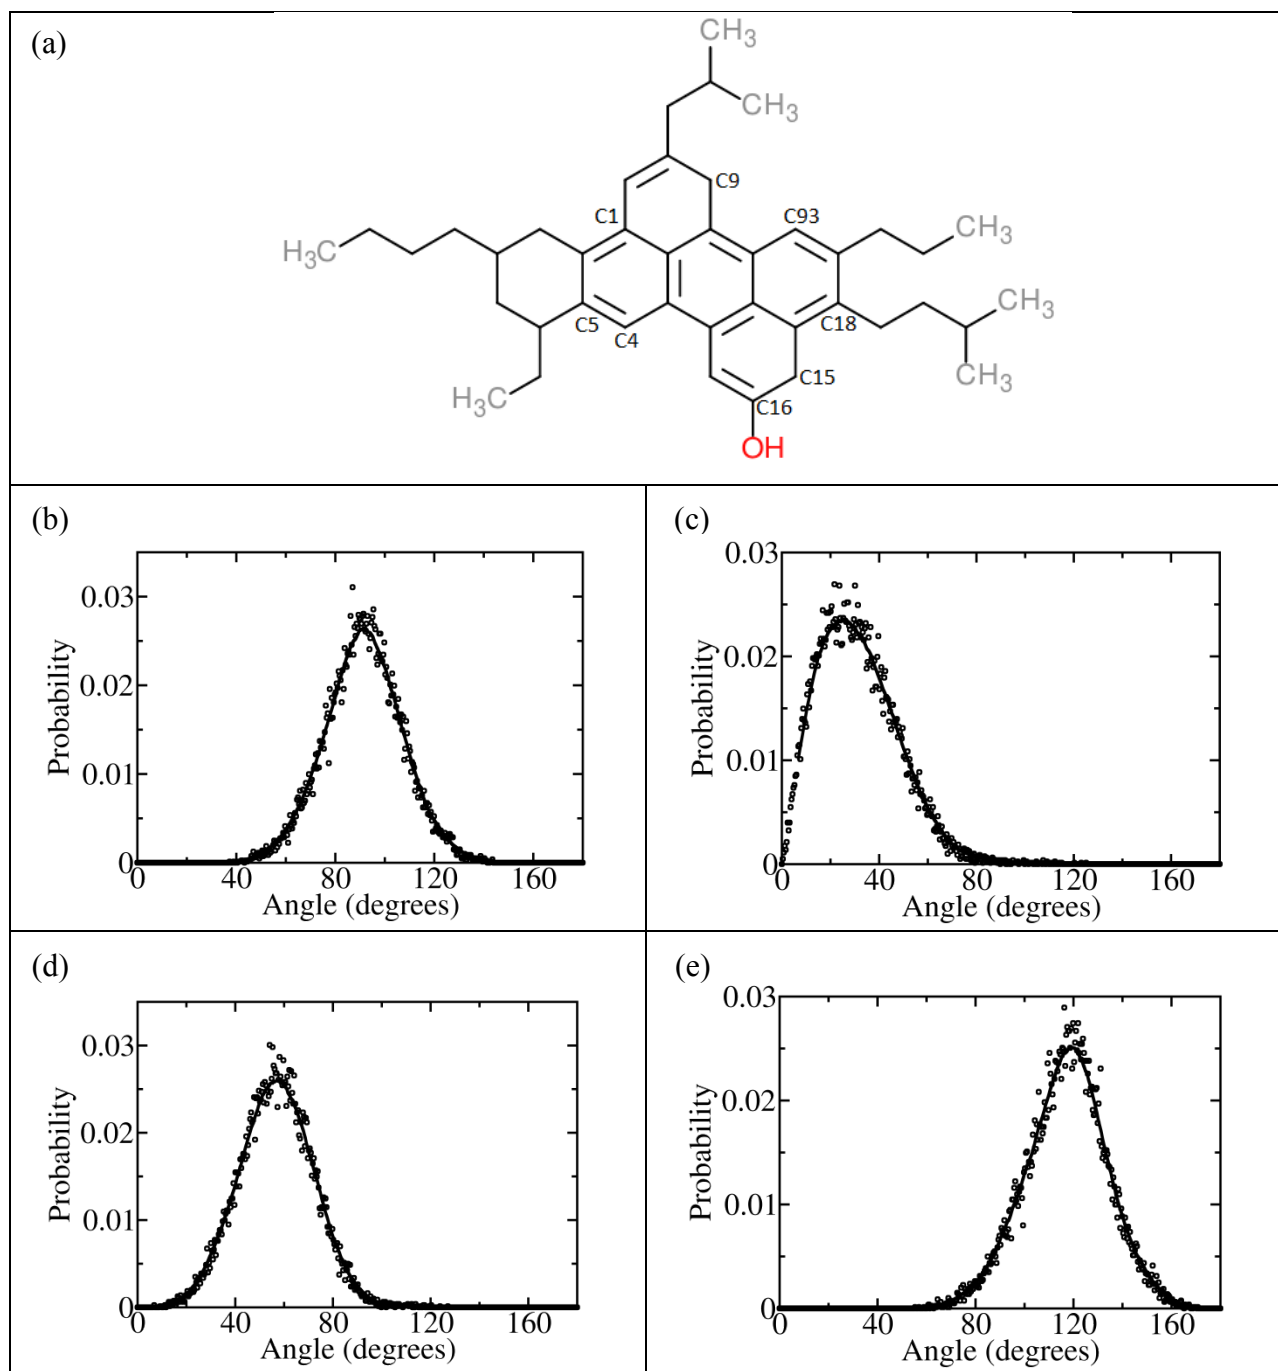

**Figure S1:** (a) Structure of asphaltene-phenol (APH) molecule. Orientational distribution of the APH molecule defined by the angle formed between oil-water interface normal (i.e. z-axis) and vector formed by (b) C5 and C18 atoms, (c) C9 and C16 atoms, (d) C1-C15 atoms and (e) C4-C93 atoms of APH molecule

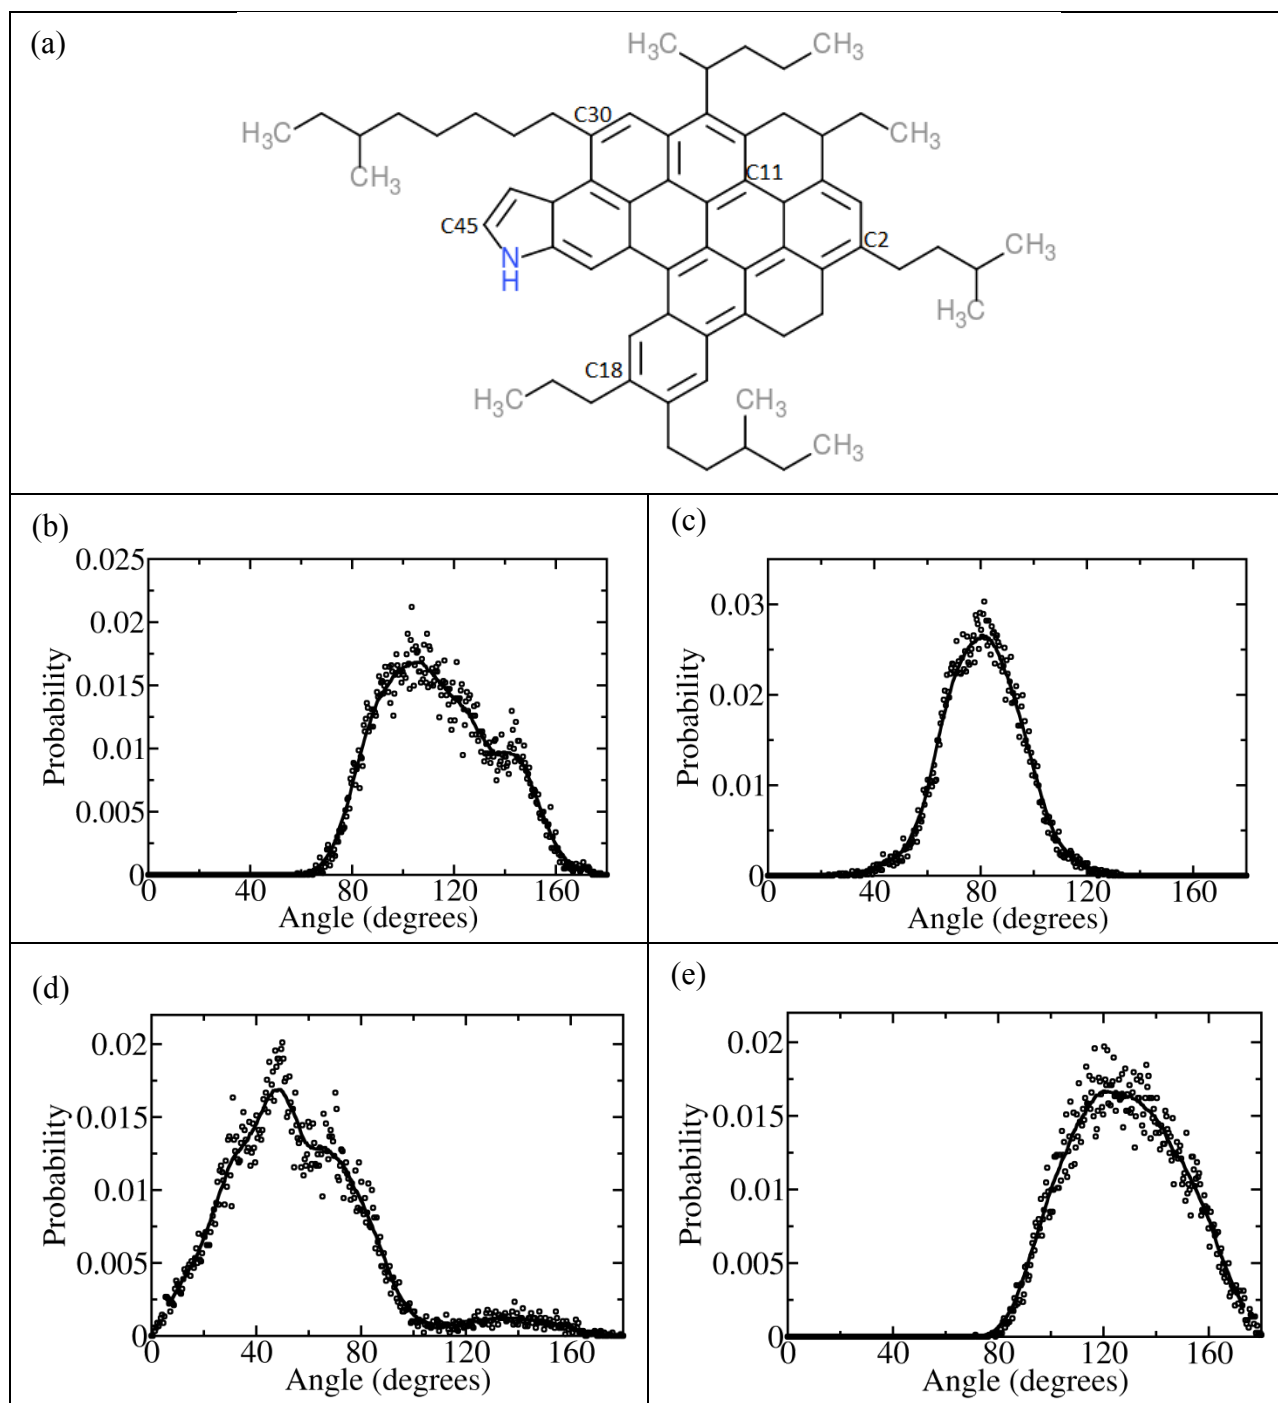

**Figure S2:** (a) Structure of asphaltene-pyrol (APY) molecule. Orientational distribution of the APY molecule defined by the angle formed between oil-water interface normal (i.e. z-axis) and vector formed by (b) C30 and C18 atoms, (c) C30 and C2 atoms, (d) C45 and C2 atoms and (e) C18 and C11 atoms of APY molecule

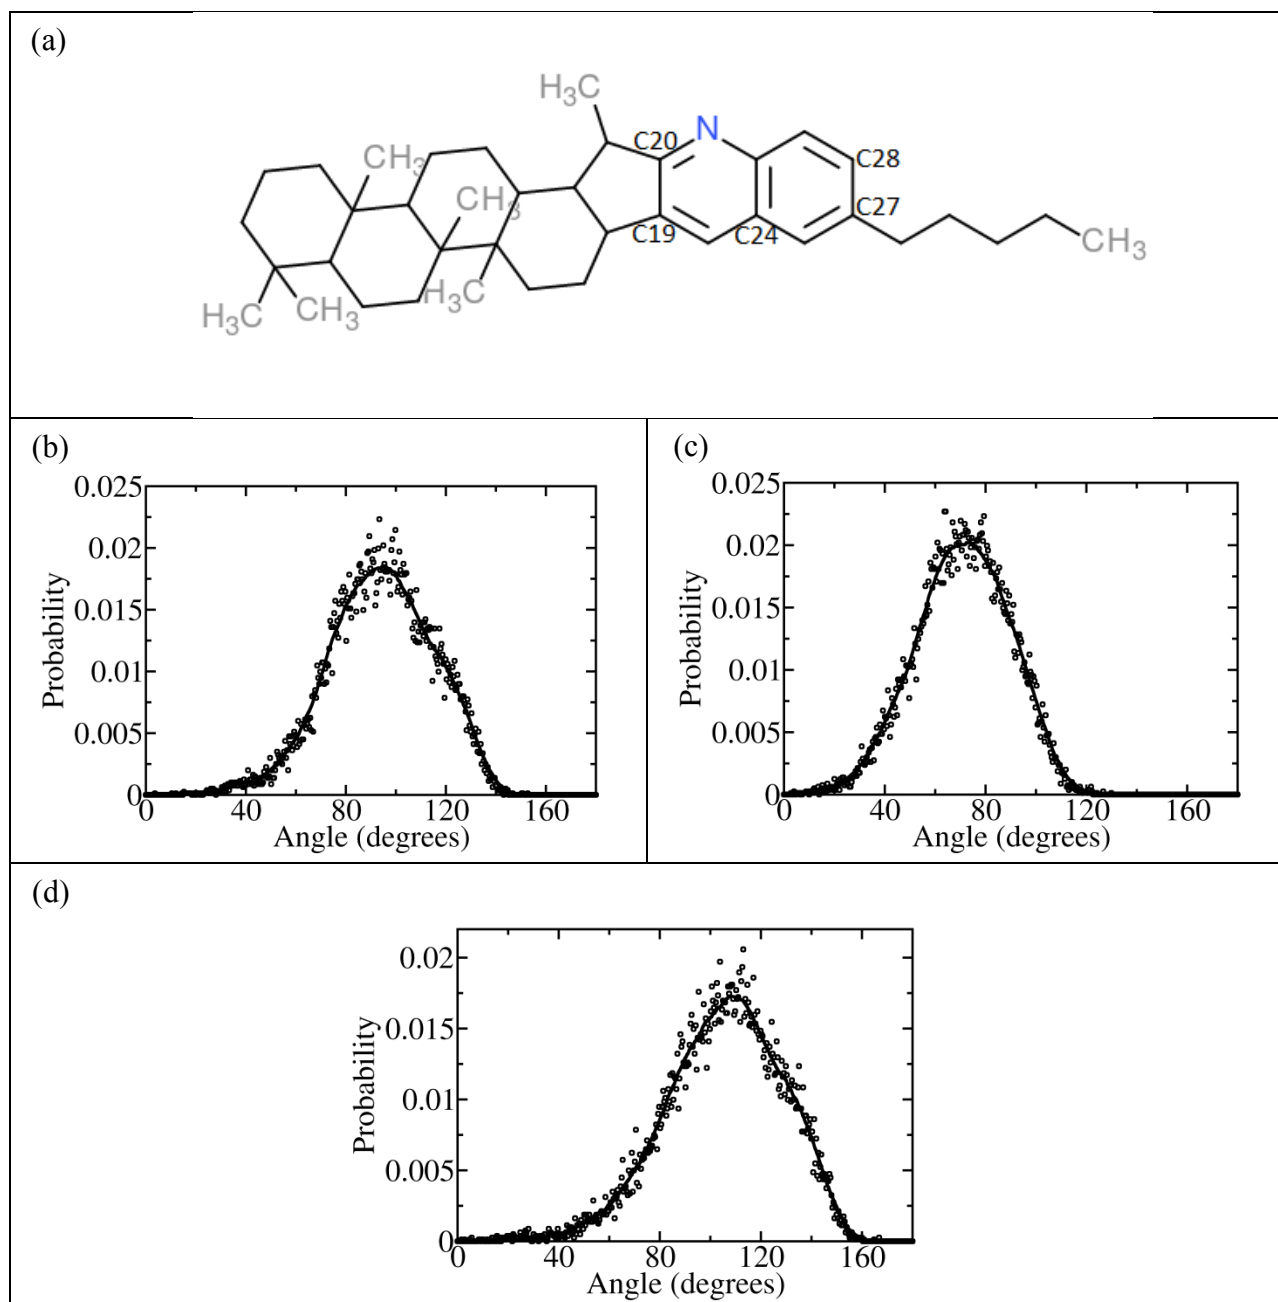

**Figure S3:** (a) Structure of quinilinohopane (QHP) molecule. Orientational distribution of the QHP molecule defined by the angle formed between oil-water interface normal (i.e. z-axis) and vector formed by (b) C20 and C27 atoms, (c) C19 and C28 atoms, and (d) C20 and C24 atoms of QHP molecule.

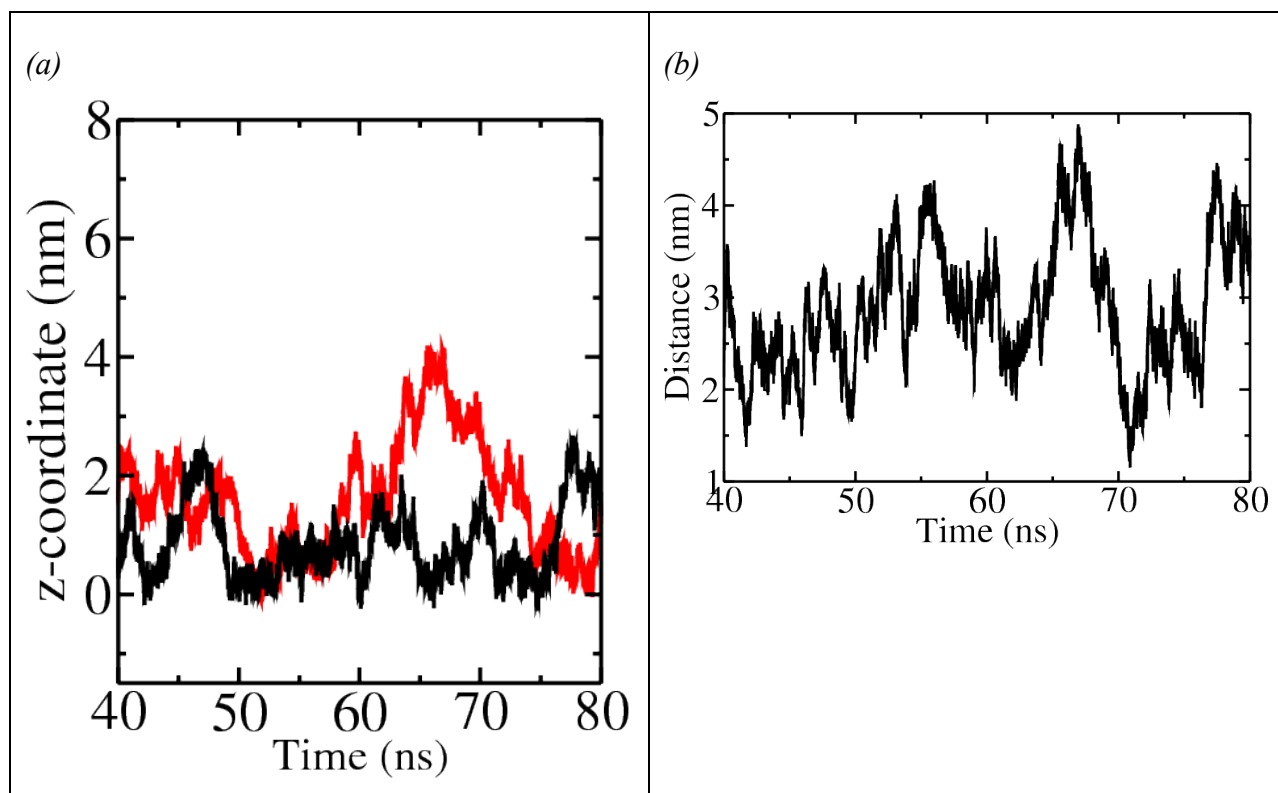

**Figure S4:** Variation in (a) z- coordinate and (b) distance between two ATH molecules center of mass with respect to time obtained from additional 40ns simulations. Both ATH molecule neither aggregate nor adsorb at the oil-water interface.
